# Supplementary material for: Elemental anion thermal injection synthesis of nanocrystalline marcasite iron dichalcogenide FeSe2 and FeTe2
Source: Royal Society of Chemistry journal article supplement (doi:10.1039/c6ra06351a), 2016-01-01
Supplement: c6ra06351a1.pdf [file c6ra06351a1.pdf]

## Supporting Information (SI)

# Elemental Anion Thermal Injection Synthesis of Nanocrystalline Marcasite Iron Dichalcogenide FeSe<sub>2</sub> and FeTe<sub>2</sub>

Ebin Bastola, Khagendra P. Bhandari, Anthony J. Matthews, Niraj Shrestha, Randy J. Ellingson\*

Wright Center for Photovoltaic Innovation and Commercialization, Department of Physics and Astronomy, School for Solar and Advanced Renewable Energy, The University of Toledo, 2801 W. Bancroft Street, Toledo, Ohio 43606

\*email: randy.ellingson@utoledo.edu

### 1. XRD pattern of as-synthesized nanocrystalline FeSe<sub>2</sub> as a function of reaction temperature.

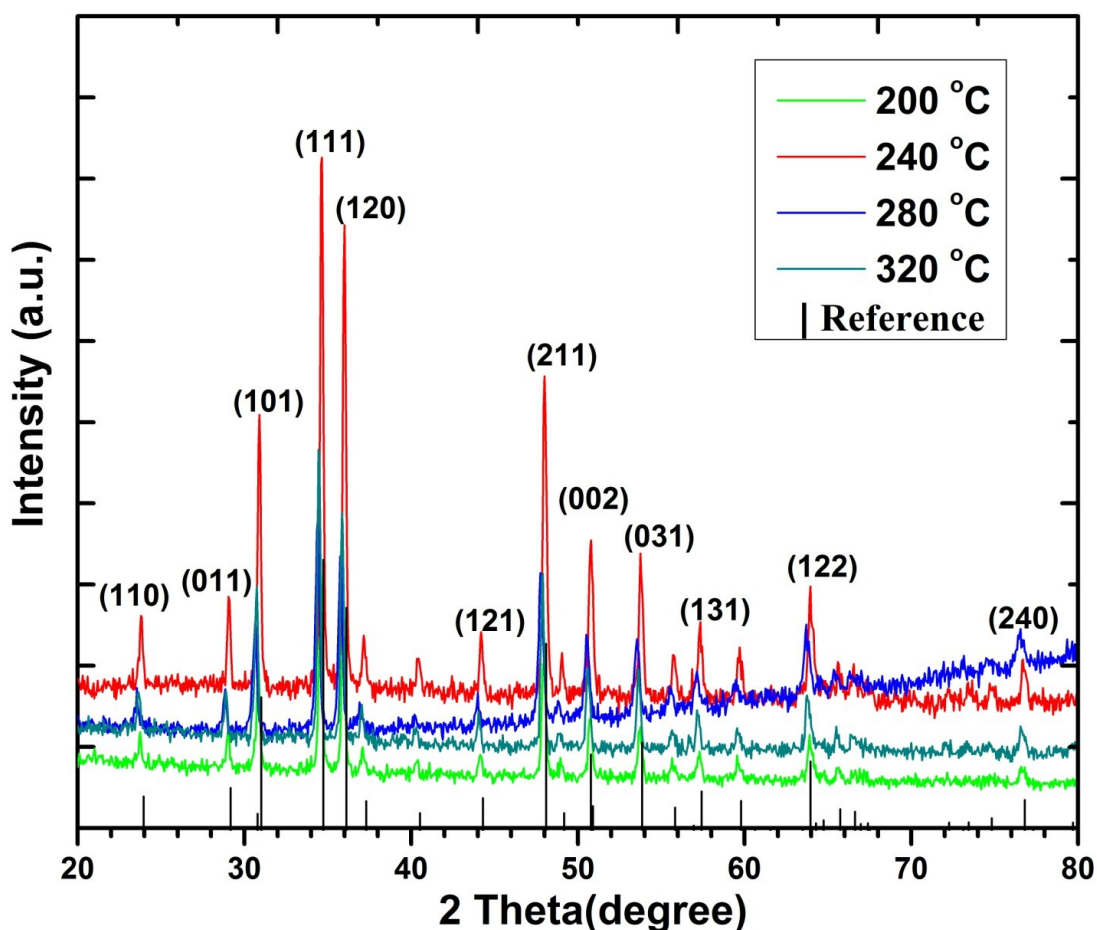

**SF1.** XRD pattern of nanocrystalline FeSe<sub>2</sub> synthesized at different temperature. The black vertical lines represent the standard XRD pattern of orthorhombic marcasite FeSe<sub>2</sub> materials obtained from MDI JADE software PDF # 97- 004-2041. All syntheses of FeSe<sub>2</sub> NCs resulted in orthorhombic crystal structure with marcasite phase. The 280 °C trace rises with increasing 2θ due to an artifact of the measurement arising

from the use of a soda lime glass substrate; all other XRD patterns were measured for samples prepared on a zero-background single-crystal silicon substrate.

## 2. XRD pattern of as-synthesized nanocrystalline FeTe<sub>2</sub> as a function of reaction temperature.

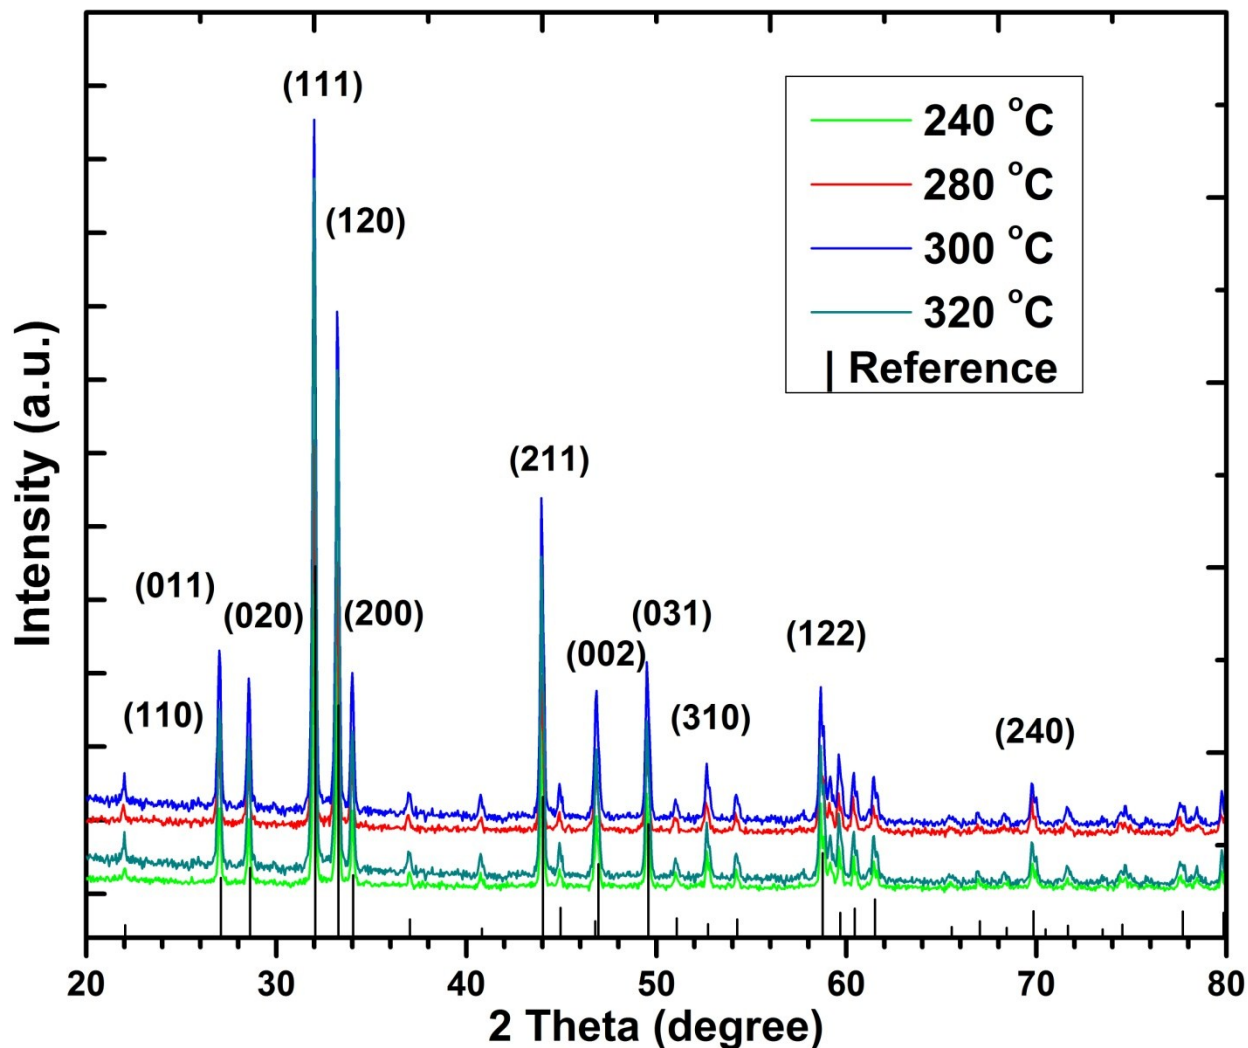

**SF2.** XRD pattern of nanocrystalline FeTe<sub>2</sub> synthesized at different temperatures. The reference line is the standard XRD pattern of iron ditelluride (FeTe<sub>2</sub>) (PDF # 97-063-3879) which shows excellent agreement with the XRD pattern of the synthesized FeTe<sub>2</sub> NCs. These FeTe<sub>2</sub> samples, synthesized at different temperatures, all exhibit orthorhombic crystal structure and marcasite phase.

**3. Scanning electron microscopy (SEM) images of nanocrystalline FeSe<sub>2</sub> synthesized for different growth durations.**

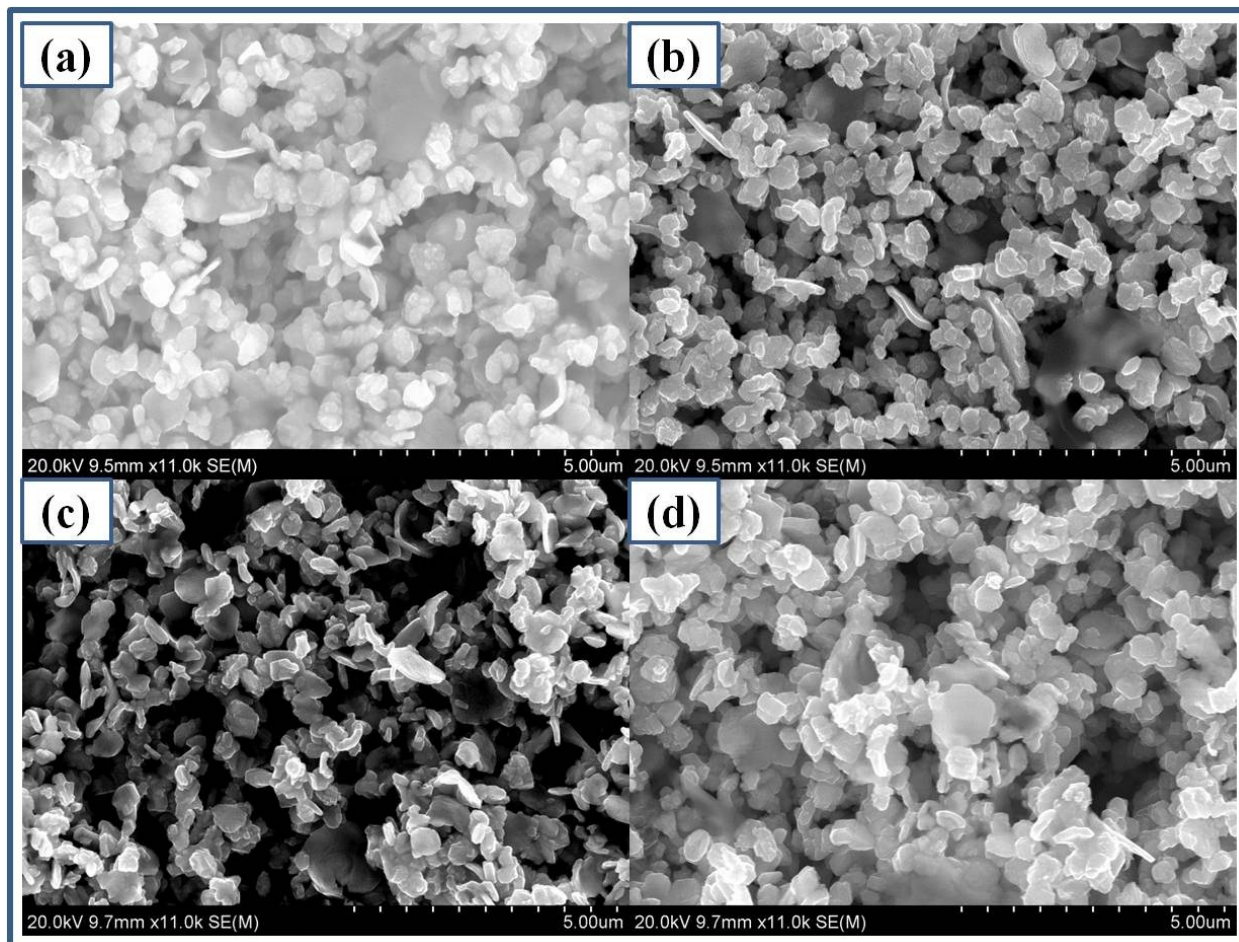

**SF3.** SEM Images of NC FeSe<sub>2</sub> synthesized at different growth durations after the injection of Se precursor to the reaction flask at 220 °C (a) 1 minute (b) 5 minutes (c) 15 minutes (d) 30 minutes. The XRD pattern of each of these NC samples confirm they are orthorhombic crystal structure in marcasite phase, and EDS analysis indicates the ratio of Fe to Se is  $1.99 \pm 0.03$ .

**4. Scanning electron microscopy (SEM) images of nanocrystalline FeTe<sub>2</sub> synthesized for different growth durations.**

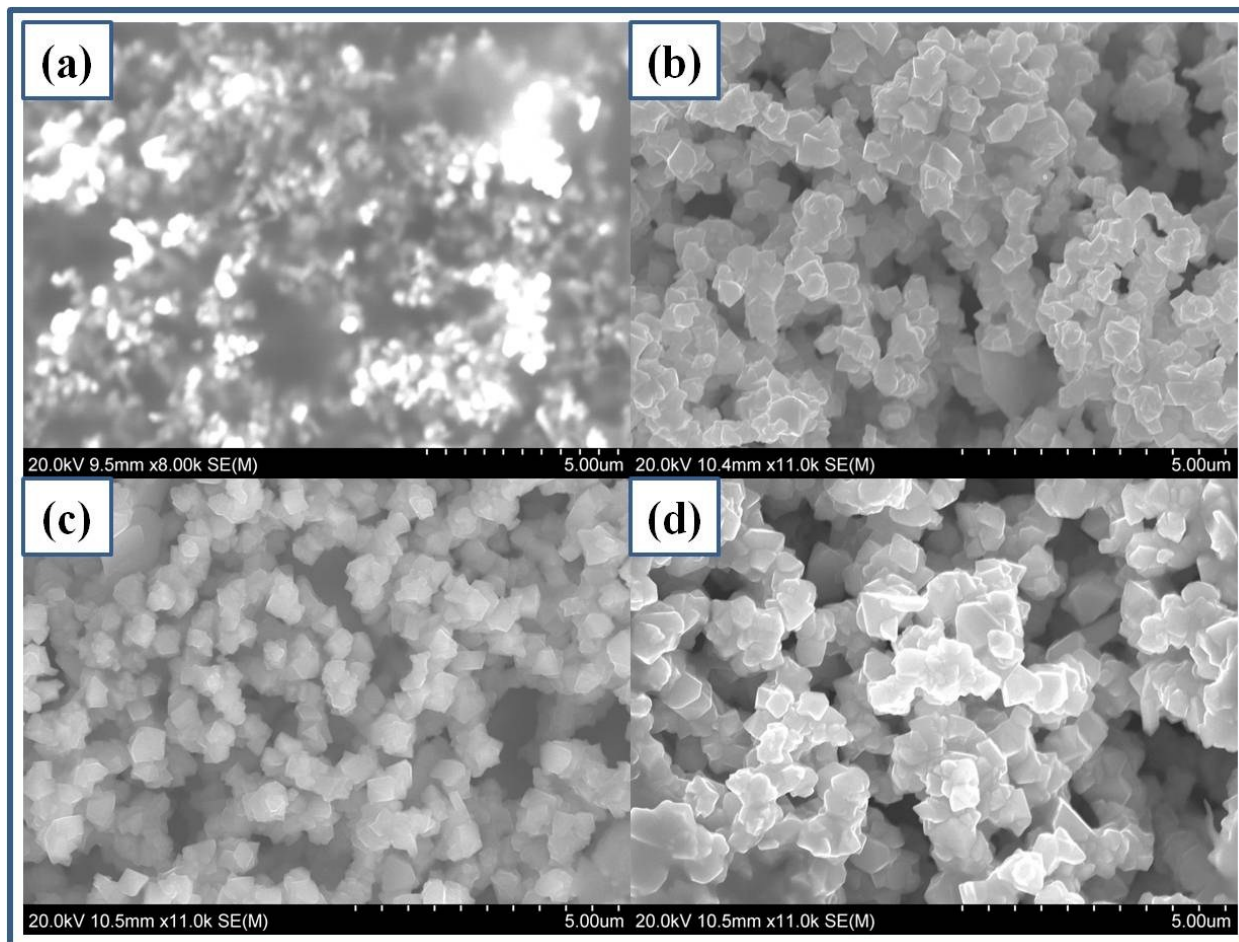

**SF4.** SEM Images of NC FeTe<sub>2</sub> synthesized at 300 °C with different growth duration after the injection of Te precursor to the reaction flask (a) 1 minute (b) 5 minutes (c) 15 minutes (d) 30 minutes. The XRD pattern of these samples, with the exception of the 1 minute growth sample, are orthorhombic marcasite crystal structure. The EDS analysis shows the ratio of Fe to Te atoms is  $2.04 \pm 0.02$ . In the case of 1 minute reaction time (a), the ratio of Fe to Te atoms is close to 1:1.

## 5. Energy dispersive spectroscopy (EDS) for nanocrystalline FeSe<sub>2</sub> and FeTe<sub>2</sub>

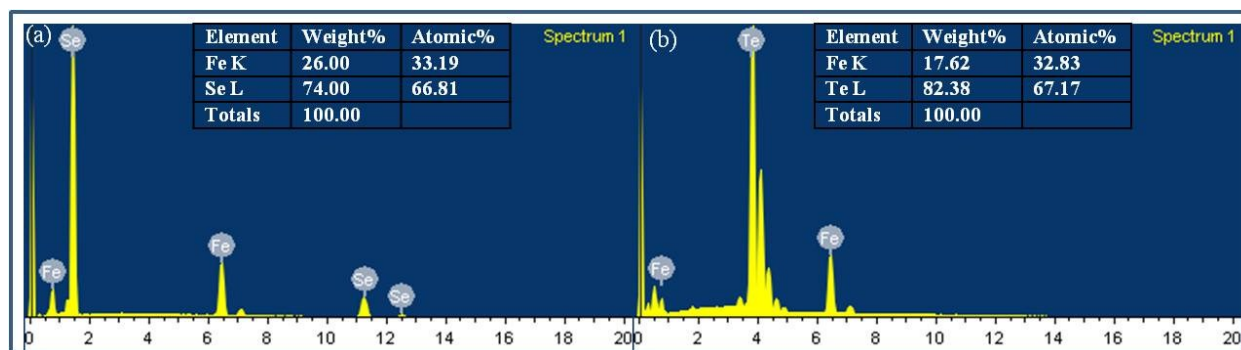

SF5. EDS analysis for as-synthesized nanocrystalline (a) FeSe<sub>2</sub> and (b) FeTe<sub>2</sub>

## 6. UV- Vis- NIR Spectroscopy of NC FeSe<sub>2</sub> and FeTe<sub>2</sub>

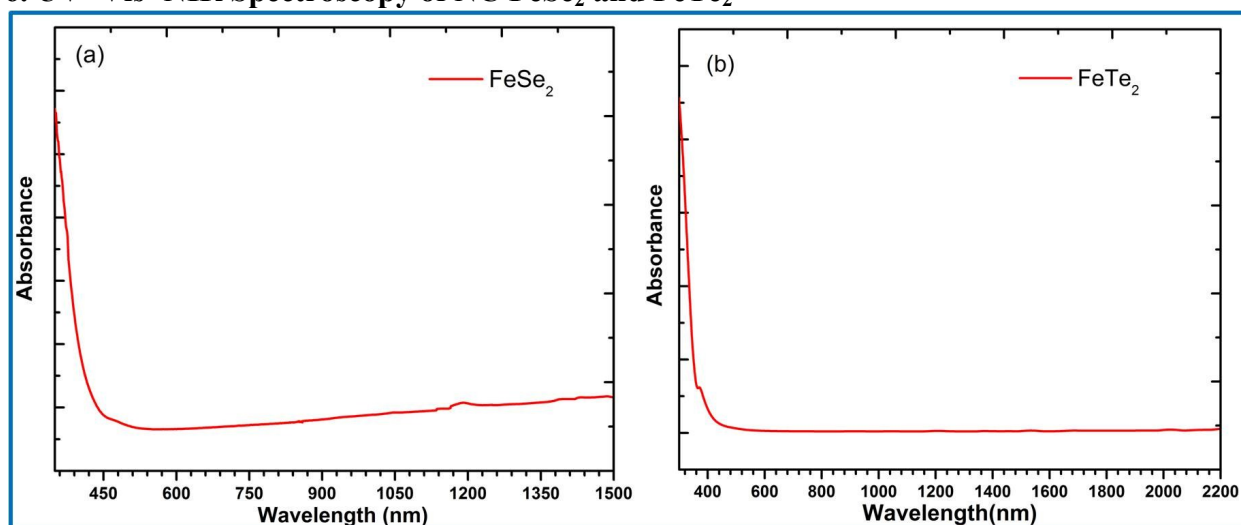

SF6. UV- Vis- NIR Spectra of as-synthesized nanocrystalline (a) FeSe<sub>2</sub>, and (b) FeTe<sub>2</sub>. The samples were prepared by dispersing the NCs in the chloroform in the cuvette with optical path length 2 mm, and the optical absorption spectra were measured relative to the solvent background. These FeSe<sub>2</sub> and FeTe<sub>2</sub> NCs possess orthorhombic crystal structure, and are in marcasite phase.
